# 1 The effect of spatial variation for 2 predicting aphid epidemics

3 Christian Damgaard, Marianne Bruus, Jørgen Aagaard Axelsen

4 Department of Bioscience, Aarhus University, Vejlsøvej 25, 8600 Silkeborg, Denmark

5

6 3500 words, 2 tables, and 3 figures.

7

8 Corresponding author: Christian Damgaard, [cfid@bios.au.dk](mailto:cfid@bios.au.dk), +45-30183153

## 9 **Abstract**

10 In order to improve forecasting of aphid epidemics, it is important to know the spatial scale at which  
11 specific forecasts are reliable. To investigate the spatial scale of aphid epidemics, we have developed a  
12 spatio-temporal stochastic aphid population growth model, and fitted the model to empirical spatial time-  
13 series aphid population data using a Bayesian hierarchical fitting procedure. Furthermore, detailed spatial  
14 data of the initial phases of epidemic development was investigated in a semivariogram. Our results  
15 suggest that there is limited spatial variation in the initial occurrence probability at a spatial scale of 10 km.  
16 Consequently, the results support the hypothesis that initial aphid population sizes and epidemics may be  
17 predicted in fields within a 10 km radius. For farmers, this may imply that they can rely their decision of  
18 whether to spray against aphids on observations made by other nearby farmers or by the consultancy  
19 service.

20 *Keywords:* Aphid population model; spatial and temporal model; hierarchical models

21

## 22 Introduction

23 The common cereal aphids, the Cherry oat aphid (*Rhopalosiphum padi*), the Grain aphid (*Sitobion avenae*)  
24 and the Rose-grain aphid (*Metopolophium dirrhodum*), are known to cause considerable losses to winter  
25 wheat in large parts of the world, and these species have been estimated to cause losses of 700.000 tons  
26 per year in Europe due to direct damage (Wellings et al. 1989). On top of this figure comes the indirect  
27 damage due to virus transmission and sooty mold caused by the excretion of honeydew (Larsson 2005).  
28 Therefore, there is a great interest in controlling aphids in winter wheat, and a number of simulation  
29 models have been developed to predict the population development of these pests (e.g. Ciss et al. 2014;  
30 Duffy et al. 2017; Holst & Ruggle 1997; Klueken et al. 2009). Furthermore, some population dynamic  
31 models have been combined with modules on economy and pesticide choices to produce decision support  
32 systems with the aim of helping farmers optimizing the timing of pesticide applications. Such decision  
33 support systems include CPO in Denmark (Hagelskjær & Jørgensen 2003) and GETLAUS (Gosselke et al.  
34 2001) in Germany. In a review of decision support systems, (Axelsen et al. 2012) concluded that farmers  
35 generally do not use decision support systems, and one of the reasons is that they do not find it worth the  
36 effort to spend time on estimating aphid input densities. Instead, many farmers perform precautionary  
37 insecticide treatments, which may not be economically sound.

38 The grain aphid is the most numerous aphid in winter wheat (Hansen 2003) in Denmark. In temperate  
39 regions, it overwinters on grasses as eggs. When temperatures rise in spring, the eggs hatch into unwinged  
40 females, which reproduce parthenogenetically. In the second or third generation, the majority of aphids are  
41 winged individuals, which migrate into the cereal fields. The formation of winged individuals is initiated by  
42 a complex combination of crowding (i.e. high densities), light and temperature (Hansen 2003). Despite high  
43 temperatures, crowding may be prevented by adverse temperatures, precipitation, predators and  
44 parasites. Once in the cereal fields, temperature is the key driver for aphid population growth, as shown by  
45 Jones (1979). However, population growth may be modified by heavy rainfall, wind, parasites, disease and  
46 predators (Hansen 2003; Jones 1979; Nakata 1995). Plantegenest et al. (2001) showed that not including  
47 the effects of parasitoids and especially fungal diseases may cause over-estimates of aphid population  
48 growth. Wang et al. (2015) and Chabert & Sarthou (2017) found that fertilizer input may increase aphid  
49 populations. A few papers have studied the impact of heavy rainfall on aphid populations. In cotton fields,  
50 Chamuene et al. (2018) found that in some, but not all cases rain incidents of less than 50 mm significantly  
51 increased the mortality of the aphid *Aphis gossypii*. A nine-year study of soybean fields found significant  
52 effects of precipitation patterns on the population dynamics of *Aphis glycines* (Stack Whitney et al. 2016).  
53 In laboratory experiments, Mann et al. (1995) found that the loss of *Sitobion avenae* from oat plants was

54 correlated with rain intensity and duration, and increased when combined with wind gusts. Jones (1979)  
55 observed that heavy rainfall before the ears appear may reduce aphid numbers on cereals, and that  
56 information about rainfall may complement the prediction of population size based on temperature.

57 In order to optimize the decision support systems, large efforts have been spent on improving model  
58 performance in relation to weather parameters and natural regulation. These efforts have without doubt  
59 improved the models, but taking into consideration that aphid populations develop exponentially, and that  
60 the population can double in 55 hours at 20°C (Dedryver et al. 2010), it is critical that the initial densities  
61 are determined at high precision in order to predict the epidemic development. However, surprisingly little  
62 efforts have been devoted to obtaining quick and reliable estimates of the initial densities, although several  
63 methods have been developed to estimate the density of aphids in cereals. For instance, Elliott et al. (1990)  
64 developed binomial sequential sampling plans that require rather larger efforts at low densities to produce  
65 reliable estimates, and Hansen (1991), who suggested to investigate aphid presence/absence on 50 or 100  
66 tillers and used an equation to convert to aphids per tiller. Both methods take some time, and come up  
67 with assessments of average densities with some uncertainties. The uncertainties are predefined in the  
68 sequential sampling plan and the required uncertainty level is decisive for the number of plants to  
69 investigate. When counting presence/absence on a number of straws, the uncertainty can be calculated  
70 before being used in simulation models and decision support systems. However, none of the models and  
71 decision support systems appear to use uncertainty in their projections of aphid population development,  
72 and in turn relate uncertainties to the output. Given that aphids show exponential population growth,  
73 uncertainties in the estimate of initial densities can cause large uncertainties to the projections of the aphid  
74 population density some weeks later. This uncertainty should ideally be reflected in the suggestions  
75 produced by a decision support system.

76 To predict the spatial and temporal development of aphid epidemics it is important to sample and model  
77 population data that encompasses both spatial and temporal dimensions. In this study, we have sampled  
78 aphid populations in a spatial setup during both the initial and the epidemic phase to fit an epidemic  
79 model. More specifically, we have developed a spatio-temporal stochastic aphid population growth model  
80 and fitted the model to empirical spatial time-series aphid population data using a Bayesian hierarchical  
81 fitting procedure. Such Bayesian hierarchical population models have successfully been applied on a  
82 number of pest cases, e.g. the population dynamics of coffee berry borer infestation (Ruiz-Cárdenas et al.  
83 2009). The fitted spatio-temporal population growth model may be used to generalize existing  
84 deterministic aphid forecasting models with the effect of stochastic spatial variation. Furthermore, we use

85 the fitted model and complementary spatial statistics to investigate the hypothesis that initial aphid  
86 population sizes and epidemics may be predicted in fields within a 10 km radius of the nearest aphid-  
87 monitoring site.

## 88 **Materials and Methods**

### 89 **Field sites and aphid sampling**

90 The occurrence probability of the grain aphid, *Sitobion avenae*, i.e. the percentage wheat straws with  
91 aphids (correlated with both number of aphids per straw, and number of aphids per area (Feng et al. 1993;  
92 Hansen 2003; Hein et al. 1995)), was recorded in twelve wheat fields in central Jutland, Denmark, in 2016  
93 and 2017. The wheat fields (=sites) were laid out in hierarchical geographic design with three regions of  
94 four sites. In Denmark, aphids are monitored in the official aphid-sampling programme (Observation Web,  
95 <https://www.landbrugsinfo.dk/planteavl/plantevaern/varslingsregistrerings-net/-sider/startside.aspx>). In  
96 the current project, we used an Observation Web field as centre site for each of the three regions, and  
97 within each region, three other sites (fields), positioned approximately three, six and ten kilometers away  
98 (Fig. 1), were studied. As a consequence of the proximity of some of the Observation Web fields, the three  
99 regions overlap to some extent. At each site, the occurrence probability of aphids on individual plants were  
100 recorded and the occurrence probability was used as a proxy for the aphid population size, based on the  
101 fact that percentage straws with aphids is highly correlated with the number of aphids per square meter  
102 (Feng et al. 1993; Hansen 2003; Hein et al. 1995).

103 In 2016, aphid occurrence was recorded for five samples of either 80 or 100 wheat plants at each site on  
104 May 24, June 6, June 13, June 20, June 27, July 4, and July 11. The five samples within a site were taken  
105 along a transect with at least 50m between samples. Site-specific degree-days were calculated from the  
106 average day temperature at the weather station closest to each site with a base temperature of 5 degrees  
107 Celsius. Furthermore, the intensity of precipitation events at the different sites was recorded daily by a  
108 weather station placed at each field (Agrimex® Rosenborg 35980).

109 In order to complement the result of the spatial variation of the initial phases of aphid epidemics obtained  
110 in the spatial modelling of the aphid occurrence data sampled in 2016, aphid occurrence was recorded  
111 more intensively at the same twelve sites in the beginning of the growth period the following year and  
112 analyzed in a semivariogram. In 2017, aphid occurrence was recorded for ten samples of 50 wheat plants at

113 each site on May 30 and June 7. The ten samples within a site were laid out along three transects with at  
114 least 50m between all plots, and the exact geographical position of each sample was determined.

## 115 **Statistical modelling of the aphid population**

116 The spatio-temporal aphid occurrence data is modelled using Bayesian hierarchical methods (Clark &  
117 Gelfand 2006). The observed number of straws with at least one aphid at site  $i$  and plot  $k$  at degree-day  $t$  is  
118 denoted  $y_{i,k,t}$  and is assumed to be binomially distributed with  $n_{i,k,t}$ , the number of straws sampled, and  
119  $p_{i,t}$ , the occurrence probability that a straw has at least one aphid at site  $i$  at degree-day  $t$ ,

$$120 \quad y_{i,k,t} \sim \text{Bin}(n_{i,k,t}, p_{i,t}) \quad (1).$$

121 The site-specific occurrence probability is modelled using an exponential function of degree-day  $t$ ,

$$122 \quad p_{i,t} = p_{i,0} \text{Exp}(r_0 + r_1 t + r_2 t^2 + \epsilon_i) \quad (2),$$

123 where  $p_{i,0}$  is the occurrence probability on a fixed initial day,  $r_0$ ,  $r_1$ , and  $r_2$  are population growth  
124 parameters, and  $\epsilon_i$  are Gaussian distributed site-specific random effects,  $\epsilon_i \sim \text{Gau}(0, \sigma_p^2)$ .

125 The  $n$  site-specific initial occurrence probabilities are assumed to arise from a Gaussian process model,

$$126 \quad p_{i,0} \sim \text{Gau}(\mu_0, \Sigma), \quad \Sigma = \begin{pmatrix} \sigma_0^2 & \cdots & \sigma_0^2 \rho(d_{1,n}) \\ \vdots & \ddots & \vdots \\ \sigma_0^2 \rho(d_{n,1}) & \cdots & \sigma_0^2 \end{pmatrix} \quad (3),$$

127 where  $\mu_0$  is the mean initial occurrence probability,  $\sigma_0^2$  is the variance, and  $\rho(d_{i,j}) = \rho_0 \text{Exp}(-\frac{d_{i,j}}{\alpha})$  with  
128  $d_{i,j}$  being the distance between site  $i$  and site  $j$ ,  $\alpha$  is the scale of the spatial effect that is set to 10 km, and  
129  $\rho_0$  is a parameter that measures the spatial covariance (Haran 2011; Ovaskainen et al. 2016). The  
130 covariance matrix by definition has to be positive definite, which puts upper and lower bounds on  $\rho_0$ .

131 The prior distributions of all parameters were assumed to be uniform except the two scale parameters that  
132 were assumed to be inverse gamma distributed,  $\sigma_p \sim \text{Invgam}(0.1, 0.1)$  and  $\sigma_0 \sim \text{Invgam}(0.1, 0.1)$ . The joint  
133 Bayesian posterior distribution of the parameters and the two latent variable vectors,  $p_{i,0}$  and  $\epsilon_i$ , each of  
134 dimension  $n$ , were calculated using Markov Chain Monte Carlo (MCMC), Metropolis-Hastings, simulations

135 with a multivariate normal candidate distribution and using a MCMC run of 300,000 iterations after a burn-  
136 in period.

137 Plots of the sampling chains of all parameters and latent variables were inspected in order to check the  
138 mixing properties of the used sampling procedure, and whether the burn-in period was sufficient.  
139 Additionally, the overall fitting properties of the model were checked by inspecting the regularity and  
140 shape of the marginal distribution of all parameters as well as the distribution of the deviance ( $=$   
141  $-2 \log L(Y|\theta)$ ). The efficiency of the MCMC procedure was assessed by inspecting the evolution in the  
142 deviance.

143 Statistical inferences on the parameters were based on the marginal posterior distribution of the  
144 parameters.

145 All calculations were done using *Mathematica* version 10 (Wolfram 2015).

## 146 **Results**

147 The observed spatio-temporal mean occurrence probability of *S. avenae* in 2016 (Fig. 2) was fitted to the  
148 spatial growth model. The burn-in period of the MCMC was relatively long (600,000 iterations), but after  
149 the deviance had stabilized, the fitting properties of the models were judged to be acceptable based on  
150 visual inspections of the mixing properties of the parameters and the latent variables.

151 The marginal posterior distributions of the parameters of interest are summarized in Table 1 by their  
152 percentiles. The parameters were generally uncorrelated, except for, as expected, the estimates of the  
153 population growth parameters  $r_0$ ,  $r_1$  and  $r_2$ , which were highly correlated (Table 2).

154 The deterministic part of the population growth model (eqn 1.) seemed to adequately model the dynamics  
155 of aphid occurrence probabilities as a function of degree days from June 1 2016 to July 1 2016 (Fig. 3) when  
156 shape and mode of the expected epidemic was visually compared to the observed spatio-temporal mean  
157 occurrence probability data in the same period (Fig. 2).

158 The posterior marginal distribution of the parameter that measures the effect of geographic distance on  
159 the spatial covariance,  $\rho_0$ , is left-skewed towards the upper boundary and significantly larger than zero  
160 (Table 1), and the site-specific initial occurrence probabilities are consequently positively correlated among

161 the sites at the spatial scale of 10 km. However, the importance of this positive correlation for the among-  
162 site variation in aphid epidemics has to be evaluated in relation to the estimated among-site variation in  
163 the initial occurrence probability as modelled by  $\sigma_0$ , and population growth as modelled by  $\sigma_p$  (Table 1).

164 The rainfall of the 2016 season is presented in the electronic supplement. Incidents of heavy rain were  
165 observed in late May and in June, especially in the Viborg region, with incidents of up to 25 mm per day.  
166 However, if the observed rain records at the sites were manually scored according to severity and  
167 compared to the latent variables that model the among-site variation in population growth,  $\epsilon_i$ , then there  
168 was no significant relationship between the heavy rain score and population growth rate ( $P = 0.89$ ).

169 The variation in aphid occurrence among sampling plots as a function of the geographical distance among  
170 plots on May 30 and June 7 2017 is shown as a semi-variogram (Fig. 4). Generally, the variation among plots  
171 is relative low at the two sampling days, although the variation seems to increase irregularly with time  
172 when assessed from only two samples in time. There is a slight indication that the variation among plots  
173 increases with the distance among plots at the second sampling.

## 174 Discussion

175 The site-specific initial occurrence probabilities were found to be positively correlated among the sites at  
176 the spatial scale of 10 km. However, when the spatial variation in the initial occurrence probability was  
177 examined in more detail the following year, the spatial variation among plots in the beginning of the aphid  
178 epidemics did not seem to increase much with among-plot distance. This indicates that there was only  
179 limited spatial effects, i.e. that the initial epidemic development was more or less in synchrony over  
180 distances up to and above 10 km. Since the parameter that measures the effect of geographic distance on  
181 the spatial covariance,  $\rho_0$ , also depends on the spatial variation in the following aphid epidemic estimated  
182 from the 2016 data set, we tend to put more weight on the more detailed investigation in 2017, and  
183 conclude that our investigation suggest that there is limited spatial variation in the initial occurrence  
184 probability. Consequently, the overall results support the working hypothesis that initial aphid population  
185 sizes and epidemics may be predicted for fields within a 10 km radius of the aphid-monitoring site. For  
186 farmers, this may imply that they can rely their decision of whether to spray against aphids on observations  
187 made within a distance of up to 10 km.

188 We did not detect any significant effects of heavy rain events on aphid occurrence probability. This is  
189 contradictory to the conclusions of Whitney et al. (2016) and the experimental findings by Mann et al.



190 (1995) that heavy rainfall may cause a loss of aphids up to 30 % of the population. The rainfall incidents  
191 measured per day in the present study resemble those studied by Chamuene et al. (2018), who found that  
192 such incidents may cause increased aphid mortality and hence reduce population growth in some, but not  
193 all cases. One reason why we did not see a reduced population increase may be that most rainfall incidents  
194 happened after the ears of the winter wheat appeared, as Jones (1979) only found rainfall before ear  
195 appearance to affect aphid numbers.

196  
197 The simple quadratic function used to model population growth as a function of degree-days performed  
198 adequately for modelling the growth in the aphid population from June 1 2016 to July 1 2016. However, the  
199 purpose of this simple quadratic model was only to model the deterministic part of the population growth  
200 in order to quantify the stochastic variation among sites, and the fitted quadratic model is not suitable for  
201 making actual predictions outside the domain of the collected aphid population data. Instead, the  
202 deterministic part of the population growth could be the models described by Holst et al. (1997), Ciss et al.  
203 (2014), Duffy et al. (2017) or the model element of the aphid modules of decision support systems such as  
204 CPO (Hagelskjær & Jørgensen 2003) and GETLAUS (Gosselke et al. 2001).

205  
206 Most decision support systems will let the user know if it is appropriate to treat against aphids or not,  
207 without telling how certain the “decision” is (e.g. GETLAUS (Gosselke et al. 2001) and CPO (Hagelskjær &  
208 Jørgensen 2003). If the output came with uncertainties, such as “It can now with 55% certainty pay off to  
209 treat against aphids in your field”, using the decision support system may appear more difficult, because  
210 the farmer is left with an uncertain foundation for his decision. However, the output might include  
211 information on how to reduce the uncertainty. If the farmer had counted aphids on 50 tillers, the output  
212 might tell the farmer that the uncertainty would be reduced if he continued and counted on a higher  
213 number of tillers, and he could continue until he was able to take certain decisions. This would require  
214 some time, but the farmers would get some knowledge on the importance of spending time on providing  
215 the decision support system with good initial aphid density estimates, as spending more time will provide a  
216 safer foundation for decisions. Estimates of initial densities can be used to predict peak densities of *S.*  
217 *avenae* (Honek et al. 2017), and good estimates of initial densities will, everything else equal, provide  
218 better estimates of peak densities.

219  
220 Nevertheless, the farmer might still not be willing to spend the required time on counting aphid, but  
221 counting might be found worth the effort if the result could be used by neighbors, or by all farmers within a

222 certain area. This would optimize the balance between time input spend on counting aphids and economic  
223 output in terms of higher yield and probably less expenses on pesticide applications.

224 **Tables**

225 Table 1. Marginal posterior distributions of the parameters in the spatio-temporal stochastic aphid  
226 population growth model spatial when fitted to 2016 occurrence data. The distributions are summarized by  
227 their 2.5%, 50% and 97.5% percentiles.

| Parameter  | 2.5%      | 50%       | 97.5%     |
|------------|-----------|-----------|-----------|
| $r_0$      | 0.0147    | 0.0175    | 0.0215    |
| $r_1$      | -1.17E-05 | 1.32E-05  | 2.87E-05  |
| $r_2$      | -1.17E-07 | -8.83E-08 | -4.71E-08 |
| $\sigma_p$ | 0.00554   | 0.00911   | 0.01677   |
| $\mu_0$    | 0.000395  | 0.00786   | 0.01531   |
| $\sigma_0$ | 0.00509   | 0.00857   | 0.01620   |
| $\rho_0^2$ | 0.936     | 1.2185    | 1.2412    |

228

229

230 Table 2. Correlation matrix between the parameters  $r_0$ ,  $r_1$ , and  $r_2$  in the spatio-temporal stochastic aphid  
231 population growth model spatial when fitted to 2016 occurrence data.

|       | $r_0$ | $r_1$ | $r_2$ |
|-------|-------|-------|-------|
| $r_0$ | 1     | -0.96 | 0.93  |
| $r_1$ | -0.96 | 1     | 0.99  |
| $r_2$ | 0.93  | 0.99  | 1     |

232

233

234

235 **Figures**

236 Fig. 1. Twelve wheat fields in the middle of Jutland, Denmark, where aphids were sampled. The wheat field  
237 were laid out in hierarchical geographic design with three regions of four fields. Each region had a center  
238 field with fields positioned approximately three, six and ten kilometers away.

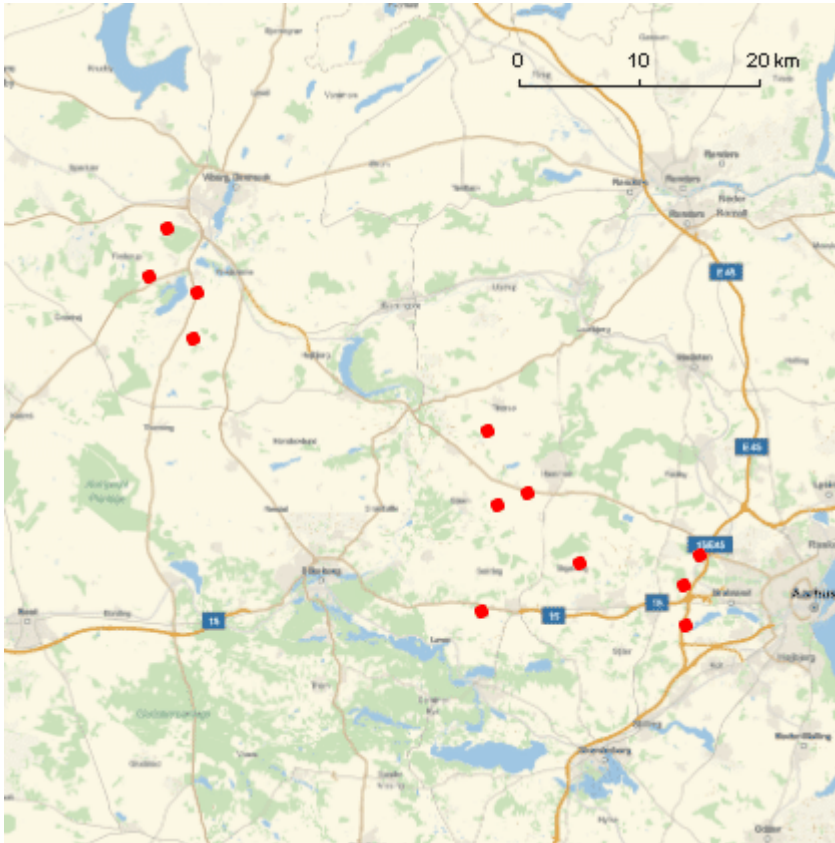

239

240 Fig. 2. Observed spatio-temporal mean occurrence probability of *S. avenae*. The sites are located in three  
241 different regions (Borum, Hammel and Viborg). Each region had a center field (0) with fields positioned  
242 approximately three (3), six (6) and ten (10) kilometers away.

243

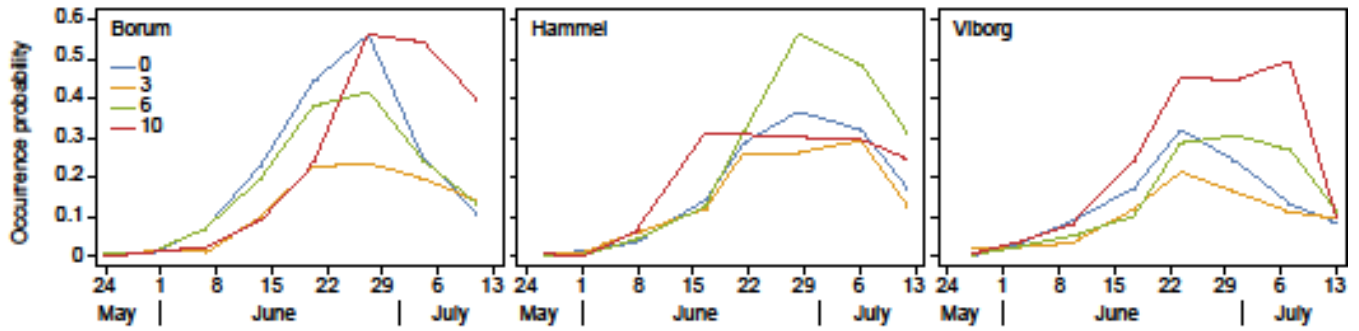

244

245

246 Fig3. Expected occurrence probability of *S. avenae* at the mean degree-days from June 1 2016 to July 1  
247 2016. The curve is calculated using equation (2), the expected  $\mu_0$ , and the joint posterior distribution of  $r_0$ ,  
248  $r_1$ , and  $r_2$ . The thick line is the median occurrence probability and the two thin lines are the 25% percentile  
249 and 75% percentile of the occurrence probability. The shaded area is the 95% credibility interval of the  
250 occurrence probability.

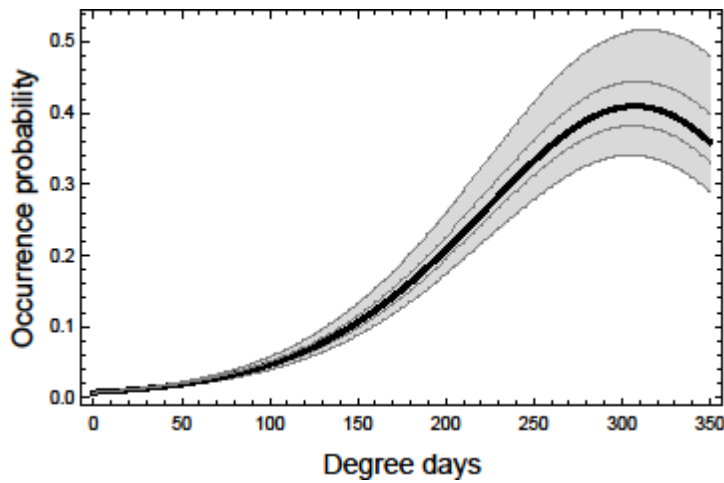

251

252

253

254 Fig. 4. Semivariogram. The variation in aphid occurrence as a function of the geographical distance among  
255 sampling plots. Blue points: May 30 2017, yellow points June 7 2017.

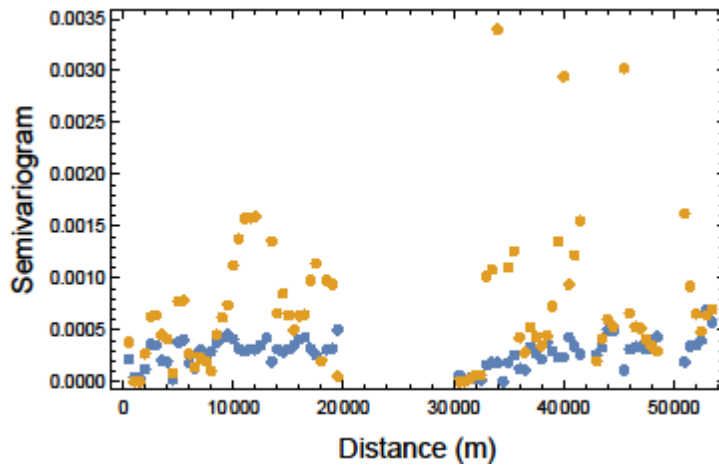

256

257



## 258 **References**

- 259 Axelsen J.A., Munk L., Sigsgaard L., Ørum J.E., Streibig J.C., Navntoft S., Christensen T., Pedersen A.B., Elkjær  
260 K., Korsgaard M. and Bonefeld-Jørgensen E.C. 2012. Udredning om monitorings, varslings- og  
261 beslutningsstøttesystemer for skadevoldere i planteproduktionen i landbrug, gartneri og frugtavl,  
262 Miljøstyrelsen, Copenhagen, p. 192.
- 263 Chabert A. and Sarthou J.-P. 2017. Practices of conservation agriculture prevail over cropping systems and  
264 landscape heterogeneity in understanding the ecosystem service of aphid biocontrol. *Agriculture,  
265 Ecosystems & Environment* 249: 70-79.
- 266 Chamuene A., Araujo T.A., Silva G., Costa T.L., Berger P.G. and Picanco M.C. 2018. Performance of the  
267 Natural Mortality Factors of *Aphis gossypii* (Hemiptera: Aphididae) as a Function of Cotton Plant Variety  
268 and Phenology. *Environ Entomol* 47: 440-447.
- 269 Ciss M., Parisey N., Moreau F., Dedryver C.-A. and Pierre J.-S. 2014. A spatiotemporal model for predicting  
270 grain aphid population dynamics and optimizing insecticide sprays at the scale of continental France.  
271 *Environmental science and pollution research international* 21: 4819-4827.
- 272 Clark J.S. and Gelfand A.E. (eds). 2006. Hierarchical modelling for the environmental sciences. Oxford  
273 University Press, Oxford.
- 274 Dedryver C.A., Le Ralec A. and Fabre F. 2010. The conflicting relationships between aphids and men: a  
275 review of aphid damage and control strategies. *C R Biol* 333: 539-553.
- 276 Duffy C., Fealy R. and Fealy R.M. 2017. An improved simulation model to describe the temperature-  
277 dependent population dynamics of the grain aphid, *Sitobion avenae*. *Ecological Modelling* 354: 140-171.
- 278 Elliott N.C., Kieckhefer R.W. and Walgenbach D.D. 1990. Binomial Sequential Sampling Methods for Cereal  
279 Aphids in Small Grains. *Journal of Economic Entomology* 83: 1381-1387.
- 280 Feng M.G., Nowierski R., M. and Zeng Z. 1993. Binomial sampling plans for the English grain aphid, *Sitobion*  
281 *avenae* (Homoptera: Aphididae) based on an empirical relationship between mean density and proportion  
282 of tillers with different tally thresholds of aphids. *Bulletin of Entomological Research* 83: 187-196.
- 283 Gosselke U., Triltsch H., Rossberg D. and Freier B. 2001. GETLAUS01 - the latest version of a model for  
284 simulating aphid population dynamics in dependence on antagonists in winter wheat. *Ecological Modelling*  
285 145: 143-157.
- 286 Hagelskjær L. and Jørgensen L.N. 2003. A web-based decision support system for integrated management  
287 of cereal pests. *EPPO Bulletin* 33: 467-471.
- 288 Hansen L.M. 1991. Measuring aphid density in spring barley. *Danish J. Pl. Soil. Sci.* 95: 93 - 95.
- 289 Hansen L.M. 2003. Kornbladlus i vinterhvede. Rapport fra Danmarks JordbrugsForskning. Forskningscenter  
290 Flakkebjerg.

- 291 Haran M. 2011. Gaussian random field models for spatial data. In: Brooks S. P., Gelman A. E., Jones G. L. and  
292 Meng X.-L. (eds), Handbook of Markov chain Monte Carlo. CRC, Boca Raton.
- 293 Hein G.L., Elliot N.C., Michels Jr G.J. and Kieckhefer R.W. 1995. A general method for estimating cereal  
294 aphid populations in small grain fields based on frequency of occurrence. *The Canadian Entomologist* 127:  
295 59-63.
- 296 Holst N. and Ruggle P. 1997. A physiologically based model of pest–natural enemy interactions.  
297 *Experimental & Applied Acarology* 21: 325-341.
- 298 Honek A., Martinkova Z., Dixon A.F.G. and Saska P. 2017. Annual predictions of the peak numbers of  
299 *Sitobion avenae* infesting winter wheat. *Journal of Applied Entomology* 141: 352-362.
- 300 Jones M.G. 1979. Abundance of Aphids on Cereals from Before 1973 to 1977. *Journal of Applied Ecology* 16:  
301 1-22.
- 302 Klueken A.M., Hau B., Freier B., Friesland H., Kleinhenz B. and Poehling H.-M. 2009. Comparison and  
303 validation of population models for cereal aphids. *Journal of Plant Diseases and Protection* 116: 129-140.
- 304 Larsson H. 2005. A crop loss model and economic thresholds for the grain aphid, *Sitobion avenae* (F.), in  
305 winter wheat in southern Sweden. *Crop Protection* 24: 397-405.
- 306 MANN J.A., TATCHELL G.M., DUPUCH M.J., HARRINGTON R., CLARK S.J. and McCARTNEY H.A. 1995.  
307 Movement of apterous *Sitobion avenae* (Homoptera: Aphididae) in response to leaf disturbances caused by  
308 wind and rain. *Annals of Applied Biology* 126: 417-427.
- 309 Nakata T. 1995. Population Fluctuations of Aphids and Their Natural Enemies on Potato in Hokkaido, Japan.  
310 *Applied Entomology and Zoology* 30: 129-138.
- 311 Ovaskainen O., Roy D.B., Fox R. and Anderson B.J. 2016. Uncovering hidden spatial structure in species  
312 communities with spatially explicit joint species distribution models. *Methods in Ecology and Evolution* 7:  
313 428-436.
- 314 Plantegenest M., Pierre J.S., Dedryver C.A. and Kindlmann P. 2001. Assessment of the relative impact of  
315 different natural enemies on population dynamics of the grain aphid *Sitobion avenae* in the field. *Ecological*  
316 *Entomology* 26: 404-410.
- 317 Ruiz-Cárdenas R., Assunção R.M. and Demétrio C.G.B. 2009. Spatio-temporal modelling of coffee berry  
318 borer infestation patterns accounting for inflation of zeroes and missing values. *Scientia Agricola* 66: 100-  
319 109.
- 320 Stack Whitney K., Meehan T.D., Kucharik C.J., Zhu J., Townsend P.A., Hamilton K. and Gratton C. 2016.  
321 Explicit modeling of abiotic and landscape factors reveals precipitation and forests associated with aphid  
322 abundance. *Ecol Appl* 26: 2598-2608.

- 323 Wang L., Hui C., Sandhu H.S., Li Z. and Zhao Z. 2015. Population dynamics and associated factors of cereal  
324 aphids and armyworms under global change. *Sci Rep* 5: 18801.
- 325 Wellings P.W., Ward S.A., Dixon A.F.G. and Rabbinge R. (eds). 1989. *Crop loss assessment*. Elsevier, NL.
- 326 Wolfram S. 2015. *Mathematica*. Wolfram Research, Inc., Champaign, USA.

327

328 **Electronic Supplement**

329 Rainfall at the three study sites in 2016

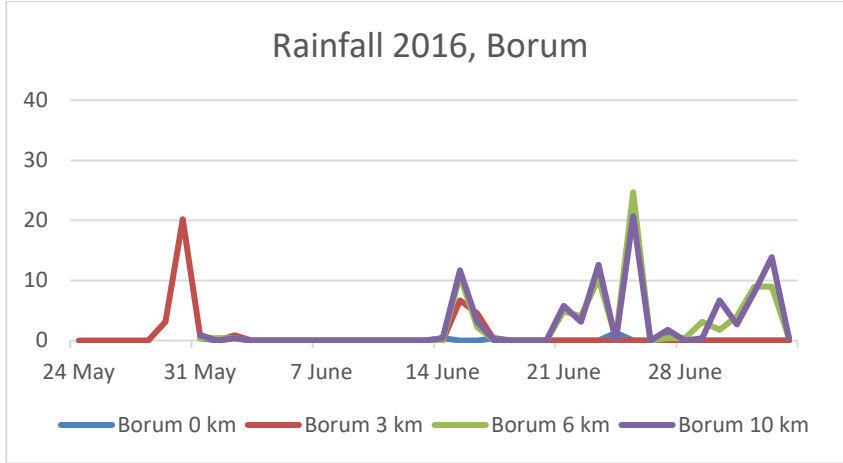

330

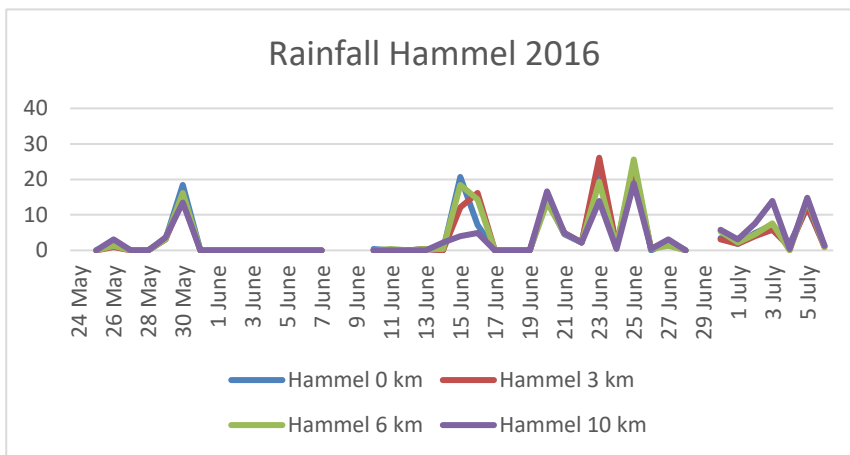

331

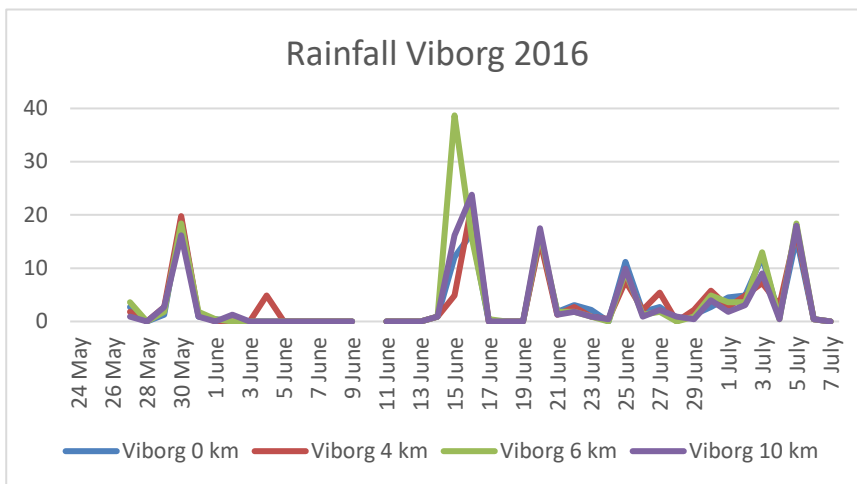

332

333
